# Supplementary material for: The AI Incident Database as an Educational Tool to Raise Awareness of AI Harms: A Classroom Exploration of Efficacy, Limitations, & Future Improvements
Source: Atypon-hosted journal article supplement (doi:10.1145/3617694.3623223), 2023-10-29
Supplement: supp_materials.pdf [file supp_materials.pdf]

## A CONSENT AND DATA COLLECTION PROCESSES

To obtain informed consent and anonymize students' data, the requisite processes started by the course instructor emailing the following:

Dear all,

As I have mentioned in the course syllabus and in prior lectures, my team and I plan to conduct a research study assessing the effectiveness of several educational tools and resources I will utilize in this course during the semester. We are writing to invite you to participate in this study.

You will not be asked to do anything beyond the normal activities and assignments that are part of the course curriculum. You have the choice of opting out of data collection for research purposes. Participants will not receive any compensation, and those opting out will not have their course outcome adversely impacted in any way.

Please see the opt-out form attached. If you wish to opt out of the study, please sign the form indicating that and send it to [student advised by instructor but not part of teaching staff] preferably before the class on [date of first research activity]. **Please do NOT cc the course staff. This way the teaching staff (including me) won't know whether you opted out until after all grades have been posted and submitted. This is to ensure that you won't feel coerced to participate in our study.** If you have any questions or concerns at any point, please don't hesitate to get in touch with me.

Best regards,

[Instructor]

The opt-out consent form contained the following information regarding data collection and usage:

Data collection: (1) In the classroom, you (the study participant) will complete a brief pre-study questionnaire aiming to assess your initial understanding of the concepts. (2) You will then learn about the concepts and the corresponding tool through the instructor. (3) You will be asked to work in teams with the tool and submit a short report in collaboration with your teammates. If all students in your team consent, we will ask you to record the audio of your deliberation via [university's] Zoom rooms and share the recording or its transcript with us. (4) You will complete a survey and participate in a class-wide evaluation of the activity. (5) Finally, one week after the class activity, you will complete a post-activity questionnaire/quiz designed to assess your final understanding of the concepts.

Most questions in our questionnaires will require open-ended responses. Please do not reveal any private or personally-identifiable information about yourselves or others in your answers to the open-ended questions. We will also ask you to provide us with basic information about your educational background and demographics. The purpose of these questions is for us to detect any significant variations in responses across the corresponding dimensions. Answering demographic questions is entirely optional.

In accordance with this outlined protocol, a Python script was run to anonymize all data by converting all email addresses and other identifiable information to random IDs in the form of integers starting from 1. No members of the research team that were also teaching staff observed identifiable information prior to running this script.

## B PRE-CLASS QUESTIONNAIRE (VERBATIM)

This questionnaire aims to understand your background, knowledge, and goals as they relate to Machine Learning (ML), Artificial Intelligence (AI), and the topics covered in [...] (our class). (Please respond to the best of your knowledge and memory and don't consult any external resources. There is no right or wrong answer to any of these questions). It also asks an optional set of questions about your demographics. Please feel free to leave that last part un-answered.

Your answers to this questionnaire will:

- (1) inform the themes, topics, and tools we will focus on during the semester.
- (2) If you consent, a de-identified version of your collective responses will be utilized in a research study by [...] (the instructor), in which she aims to assess the effectiveness of the educational tools she utilizes in this course. The opt-out consent form for the study can be found here. Please follow the instructions there if you wish to opt out.

We expect the questionnaire will take 10-15 minutes to complete (on average).

### B.1 Educational Background

- (1) Which one best describes your educational background?
  - A. Science, Technology, Engineering, Mathematics (STEM)
  - B. Humanities, Social Sciences and the Arts (HSA)
  - C. Other... (Short Answer)
- (2) What is your current major (i.e., the name of the degree program you are enrolled in)? (Short Answer)
- (3) What is the highest degree or level of school you have completed?
  - A. High school or equivalent
  - B. Bachelor degree or equivalent
  - C. Master degree or equivalent
  - D. Doctoral degree or equivalent

**Table 1: Students were offered a brief description of values taken verbatim from prior work of Jakesch et al. [32]**

| RAI value      | Description                                                                                                                                                                                                                                                                      |
|----------------|----------------------------------------------------------------------------------------------------------------------------------------------------------------------------------------------------------------------------------------------------------------------------------|
| Transparency   | A transparent AI system produces decisions that people can understand. Developers of transparent AI systems ensure, as far as possible, that users can get insight into why and how a system made a decision or inference.                                                       |
| Fairness       | A fair AI system treats all people equally. Developers of fair AI systems ensure, as far as possible, that the system does not reinforce biases or stereotypes. A fair system works equally well for everyone independent of their race, gender, sexual orientation, and ability |
| Safety         | A safe AI system performs reliably and safely. Developers of safe AI systems implement strong safety measures. They anticipate and mitigate, as far as possible, physical, emotional, and psychological harms that the system might cause.                                       |
| Accountability | An accountable AI system has clear attributions of responsibilities and liability. Developers and operators of accountable AI systems are, as far as possible, held responsible for their impacts. An accountable system also implements mechanisms for appeal and recourse.     |
| Privacy        | An AI system that respects people's privacy implements strong privacy safeguards. Developers of privacy-preserving AI systems minimize, as far as possible, the collection of sensitive data and ensure that the AI system provides notice and asks for consent.                 |
| Autonomy       | An AI system that respects people's autonomy avoids reducing their agency. Developers of autonomy-preserving AI systems ensure, as far as possible, that the system provides choices to people and preserves or increases their control over their lives.                        |
| Performance    | A high-performing AI system consistently produces good predictions, inferences or answers. Developers of high-performing AI systems ensure, as far as possible, that the system's results are useful, accurate and produced with minimal delay.                                  |

E. Other... (Short Answer)

- (4) Have you completed any courses with a significant ML component in the past? If yes, please list those courses. (Short Answer)
- (5) Which one best describes your level of familiarity with AI/ML?
  - A. None
  - B. Elementary
  - C. Intermediate
  - D. Advanced
  - E. Other... (Short Answer)
- (6) Have you received any form of training on ethical and societal considerations around the use of AI or ML?
  - A. Yes
  - B. No
- (7) If your response to the previous question was "yes", please briefly describe the nature of the training. (Short Answer)
- (8) Please briefly describe what motivated you to take this course. (Long Answer)
- (9) What do you hope to learn from/gain out of this course? (Long Answer)
- (10) Are there any specific topics, tools, or applications you would like to learn about as a part of this course?

## B.2 ML in Society

- (1) Please name a use case/application of ML in society that you are excited about. (Short Answer)
- (2) How did you learn about this use case? (Short Answer)
- (3) Please name a use case/application of ML in society that you are concerned about. (Short Answer)
- (4) How did you learn about this use case? (Short Answer)
- (5) Which one of the following broad categories of values do you believe is most urgent to address to promote the responsible use of ML in socially high-stakes domains? (A high-level description of each value–taken from prior work–is provided below. Options are ordered randomly).
  - A. Fairness
  - B. Safety
  - C. Transparency
  - D. Privacy
  - E. Accountability & governance
  - F. Human autonomy & agency
  - G. Performance & efficiency
  - H. Other... (Short Answer)
- (6) How do you believe Machine Learning experts and engineers can contribute to promoting the above value? Please elaborate. (Long Answer)

## B.3 AI News

- (1) How often do you normally hear about AI-related news (e.g., new use cases, significant advances, etc.)?
  - A. Every day
  - B. Every week
  - C. Every month
  - D. Every year

- E. Rarely
- (2) Where (or from what source) do you usually hear about AI-related news? (Options below are ordered randomly.)
- Educational resources (e.g., lectures, course material, university mailing lists, ...)
  - Social media (e.g., Twitter, Facebook, LinkedIn ...)
  - Traditional media (e.g., TV, Radio, printed or online newspapers, ...)
  - Word of mouth (e.g., through classmates, friends, and acquaintances)
  - Other... (Short Answer)
- (3) Please briefly describe an example of recent AI news you have heard about. (Long Answer)

#### B.4 Demographic Information (Optional)

The purpose of this section is to understand whether there are significant variations in your responses to the previous questions along demographic dimensions. Answering this part is entirely optional, so please feel free to leave a question unanswered if you prefer not to disclose the corresponding information about yourself. All categorical alternatives in this section have been ordered alphabetically.

- Which one better describes your political views – please pick the closest one if neither is an exact fit?
  - Conservative
  - Liberal
  - Libertarian
  - Other... (Short Answer)
- Which one best describes your gender?
  - Female
  - Male
  - Non-binary
  - Other... (Short Answer)
- What is your age group?
  - 18-26
  - 27-40
  - 41 or older
  - Other... (Short Answer)
- Which one best describes your race?
  - Asian
  - Black or African American
  - Native Hawaiian or Other Pacific Islander
  - White
  - American Indian or Alaskan Native
  - Other... (Short Answer)
- Do you believe you belong to a marginalized/disadvantaged group or community?
  - Yes
  - No
  - Other... (Short Answer)

#### B.5 Conclusion

Thank you so much for your participation!

- If you have any feedback for the teaching instructor or the research team about the questionnaire, please leave your comments here. (Long Answer)

### C IN-CLASS ACTIVITY

#### C.1 Individual activity

- Go to “Table View” tab, the search page corresponding to your number.
- Read the summary of the 10 incidents in your page.
- Among the 10, pick the incident that grabs your attention (e.g., because it’s news to you, it’s surprising, the magnitude of impact could be significant, ...)
- Read the incident report carefully.
- Then provide 1–2 word responses to the next questions.
  - What was the source of the story (e.g., which website/author published it)?
  - In what application domain did the incident occur?

- What was the nature of the incident (i.e., the concern that was raised)?
- Who was (partially) responsible for the incident (e.g., because they developed, deployed, or used the AI system)?
- Who was (potentially) harmed?
- How was the incident ultimately addressed (Was there a penalty? Was the tool discontinued?)

## C.2 Team activity

- (1) Form a team with the 4 classmates sitting closest to you.
- (2) Search for a recent AI/ML incident that has not been submitted to the database.
  - If you don't know where to start, go back to the AIID and look at alternative views of the data (e.g., spatial, entities, ...) or the review queue for inspiration.
  - It is okay if you can't find such a story after looking for 15 minutes.
- (3) Produce a team report as follows and upload it to the course website individually.
  - Submit a report on your story to AIID. Take a snapshot of your report.
  - If you didn't find a story, briefly describe your search process (e.g., queries, websites).

## D POST-ACTIVITY QUESTIONNAIRE (VERBATIM)

This questionnaire aims to assess the efficacy of the first class activity in which we explored the AI Incident Database (AIID) by eliciting your feedback about the tool. As before, there is no right or wrong answer to any of these questions.

If you consent, a de-identified version of your collective responses will be utilized in a research study by [...] (the instructor), in which she aims to assess the effectiveness of the educational tools she utilizes in this course. The opt-out consent form for the study can be found here. Please follow the instructions there if you wish to opt out.

We expect the questionnaire will take around 7 minutes to complete (on average).

### D.1 Assessing the impact of AIID

In the previous questionnaire, we asked you about

- your motivation for taking this course and the topics you'd like to learn about,
- the applications of ML in society that you are excited/concerned about,
- the values you believe should be prioritized,
- and the role of ML experts in promoting those values.

The goal of the following questions is to understand whether working with AIID has impacted your response to any of the above questions.

- (1) Having explored AIID, has your motivation for taking this course changed at all?
  - A. It hasn't changed.
  - B. It has increased.
  - C. It has decreased.
  - D. Other... (Short Answer)
- (2) Please briefly describe why you selected the answer above. (Long Answer)
- (3) Having explored the AIID, are there any new/additional uses/applications of ML in society that you are now excited about? (Long Answer)
- (4) Having explored the AIID, are there any new/additional uses/applications of ML in society that you are now concerned about? (Long Answer)
- (5) Having explored the AIID, which one of the following broad categories of values do you now believe is most urgent to address to promote the responsible use of ML in socially high-stakes domains? (A brief description of each value—taken from prior work—is provided below. Options are ordered randomly).
  - A. Fairness
  - B. Safety
  - C. Transparency
  - D. Privacy
  - E. Accountability & governance
  - F. Human autonomy & agency
  - G. Performance & efficiency
  - H. Other... (Short Answer)
- (6) Has exploring the AIID changed your belief about how Machine Learning experts and engineers can contribute to promoting the above value? Please elaborate. (Long Answer)
- (7) Having explored the AIID, are there any additional tools or topics you would like to learn about in this course? (Long Answer)

## D.2 Feedback on AIID

- (1) How likely are you to use AIID in the future?
  - A. I will refer to it frequently (i.e., at least every 1-2 weeks).
  - B. I will refer to it occasionally (i.e., every few months).
  - C. I will refer to it only if the need arises.
  - D. I will likely never use it again.
  - E. Other... (Short Answer)
- (2) Do you have any additional thoughts or comments on the limitations of AIID? (Long Answer)
- (3) How easy/difficult did you find it to work with the user interface of AIID?
  - (a) Very Easy
  - (b) Easy
  - (c) Neutral
  - (d) Hard
  - (e) Very Hard
- (4) Do you have any suggestions or ideas regarding how AIID can be improved? (Long Answer)

## D.3 Conclusion

Thank you so much for your completing this assignment!

- (1) If you have any feedback for the teaching instructor or the research team about this questionnaire in particular or the first session in general, please leave your comments here. (Long Answer)

## E IN-CLASS FINDINGS

### Q1: What was the source of the story?

- |                       |                                       |                |                                      |
|-----------------------|---------------------------------------|----------------|--------------------------------------|
| 1. The Guardian       | 11. WashingtonPost                    | 22. Vice.com   | 32. snopes.com                       |
| 2. Harvard paper      | 12. Bulletin of the Atomic Scientists | 23. Statnews   | 33. BBC                              |
| 3. standard.co.uk     | 13. WashingtonPost                    | 24. prnewswire | 34. Slate                            |
| 4. globalcitizen.org  | 14. Forbes.com                        | 29. Nabla.com  | 35. arstechnica.com                  |
| 5. Seattle Times      | 16. Keen Security Lab                 | 30. Avaaz      | 36. MIT Tech Review                  |
| 6. Detroit Free Press | 17. thedrive.com                      |                | 37. CNBC                             |
| 7. BBC                | 18. wired.com                         |                | 39. Institute for Strategic Dialogue |
| 8. USA Today          | 19. politico.eu                       |                | 40. splinter news                    |
| 9. NPR                | 20. The Atlantic                      |                |                                      |

### Q2: In which domain did the incident occur?

- |                   |                    |                   |                       |
|-------------------|--------------------|-------------------|-----------------------|
| 1. Information    | 11. Public safety  | 21. Transport     | 32. Social media      |
| 2. Advertising    | 12. War/defense    | 22. Security      | 34. Education         |
| 3. mobile devices | 13. Healthcare     | 23. Healthcare    | 35. Politics/Election |
| 4. Ecommerce      | 14. Advertising    | 24. Public Safety | 36. Computer Vision   |
| 5. Information    | 16. Self-driving   | 29. Healthcare    | 37. Security          |
| 6. Self-driving   | 17. Transportation | 30. Social media  | 39. Social media      |
| 7. Social Media   | 18. AVs            |                   | 40. Healthcare        |
| 8. Entertainment  | 19. Public Safety  |                   |                       |
| 9. Fact checking  | 20. Politics/War   |                   |                       |

### Q3: What was the nature of the incident?

- |                                   |                               |                                      |                              |
|-----------------------------------|-------------------------------|--------------------------------------|------------------------------|
| 1. Conflict between bots          | 11. facial recognition abuse  | 21. Car accident                     | 32. Fake Users               |
| 2. Racial discrimination          | 12. autonomous killer robot   | 22. Biased Facial Recognition        | 33. Discriminatory algorithm |
| 3. Algo hacking                   | 13. Discrimination            | 23. Poor performance                 | 34. Cheating                 |
| 4. sexual bias                    | 14. Inaccuracy                | 24. Waze blocking fire escape routes | 35. misinformation           |
| 5. Gender bias                    | 16. Adversarial attack        | 29. Inaccuracy                       | 36. Bias/Stereotypes         |
| 6. Harm to physical health/safety | 17. Inaccuracy                | 30. Misinformation                   | 37. Incorrect unlocks        |
| 7. Political comments             | 18. imperfect human           |                                      | 39. Inaccuracy/Bias          |
| 8. Racial bias                    | 19. Misclassification         |                                      | 40. Privacy                  |
| 9. Inaccuracy                     | 20. Deepfake - Misinformation |                                      |                              |

### Q4: Who was (partially) responsible for the incident

- |                 |                                    |                     |                      |
|-----------------|------------------------------------|---------------------|----------------------|
| 1. Wikipedia    | 11. Pimeyes                        | 21. Tesla           | 32. The BL           |
| 2. Google       | 12. GNA-AF (Libyan military)       | 22. SN Technologies | 33. UK Home Office   |
| 3. Apple        | 13. Optum                          | 23. IBM             | 34. Students, OpenAI |
| 4. Amazon       | 14. Brand safety tech              | 24. Waze, Google    | 35. Youtube          |
| 5. LinkedIn     | 16. Tesla                          | 29. OpenAI          | 36. OpenAI           |
| 6. Tesla        | 17. Bath government                | 30. Youtube         | 37. Google           |
| 7. Microsoft    | 18. auto company                   |                     | 39. Facebook         |
| 8. Niantic Labs | 19. Spanish Ministry of Interior   |                     | 40. Meta             |
| 9. Facebook     | 20. Hackers, Ukraine 24 TV channel |                     |                      |

### Q5: Who was or could have potentially been harmed?

- |                                                            |                                                     |                     |                         |
|------------------------------------------------------------|-----------------------------------------------------|---------------------|-------------------------|
| 1. Wikipedia users                                         | 11. vulnerable individuals with an online footprint | 21. Pedestrians     | 32. Facebook users      |
| 2. Racial minority groups                                  | 12. people living in Libya during war               | 22. Students        | 33. UK Visa applicants  |
| 3. iPhone users                                            | 13. seriously ill patients from minority groups     | 23. Cancer patients | 34. Students + Teachers |
| 4. Female applicants                                       | 14. Marketing agencies                              | 24. Town residents  | 35. users & citizens    |
| 5. Women                                                   | 16. drivers                                         | 29. Patients        | 36. Minority Groups     |
| 6. Driver                                                  | 17. drivers                                         | 30. Youtube users   | 37. Phone owners        |
| 7. CCP                                                     | 18. drivers                                         |                     | 39. Facebook users      |
| 8. Pokemon Go players in minority neighborhoods            | 19. Women at risk of gender violence                |                     | 40. Patients            |
| 9. Facebook users interested in US election and covid news | 20. Ukrainians, Soldiers                            |                     |                         |

### Q6: How was the incident ultimately addressed?

- |                                                               |                                        |                                             |                                                   |
|---------------------------------------------------------------|----------------------------------------|---------------------------------------------|---------------------------------------------------|
| 1. Unclear                                                    | 11. unclear                            | 21. Tesla taxi discontinued                 | 32. Fake users were deleted                       |
| 2. Unclear                                                    | 12. UN comissioned a report            | 22. Not                                     | 33. UK home office agreed to stop using algorithm |
| 3. Unclear                                                    | 13. none                               | 23. TBD/ algo update                        | 34. No                                            |
| 4. Fired the AI algorithm                                     | 14. no                                 | 24. Congress has set up a special committee | 35. No                                            |
| 5. Removed search for men specifically, tweaked search engine | 16. Tesla fixed it                     | 29. Warning issued                          | 36. Unclear                                       |
| 6. unclear                                                    | 17. Ticket thrown out                  | 30. Misinformation reports                  | 37. No                                            |
| 7. Reprogramming                                              | 18. no                                 |                                             | 39. TBD                                           |
| 8. Attributed to legacy app                                   | 19. Call for auditing                  |                                             | 40. Unclear                                       |
| 9. reduced post distribution                                  | 20. Video removed, Zelenskyy clarified |                                             |                                                   |

Figure 5: Results of students' explorations of AIID.

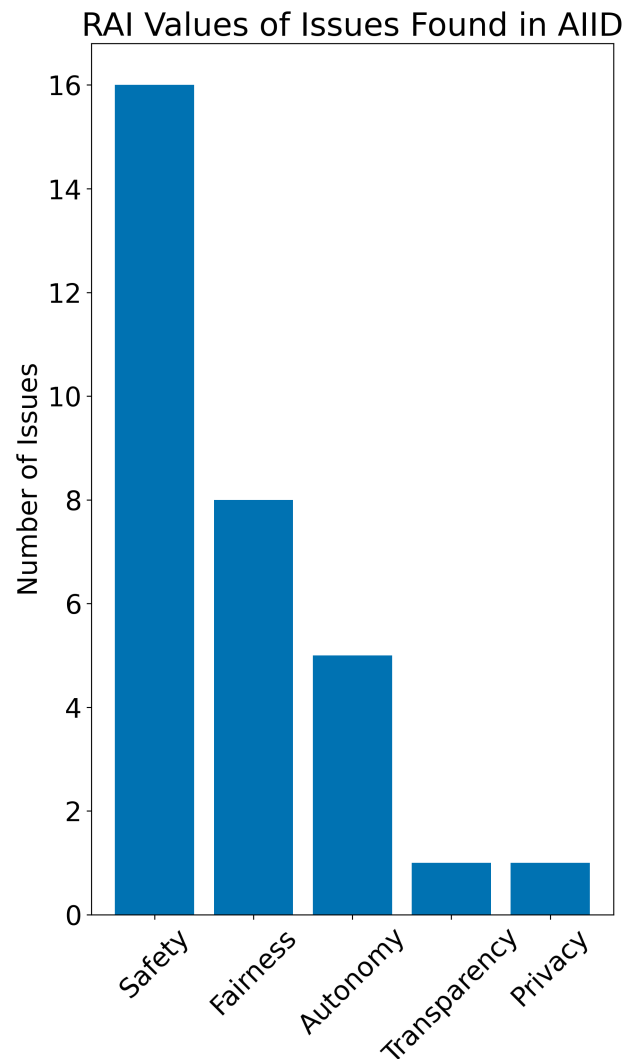

**Figure 6: Value distribution of issues found interesting by students. Of the 31 issues explored, we identified 16 as pertaining to the RAI value of Safety as per Jakesch et al. [32], 8 as pertaining to Fairness, 5 as pertaining to Autonomy, 1 as pertaining to Privacy, and 1 as pertaining to Transparency. We additionally note that Accountability & Governance cannot be a reason for an incident of harm as calls for oversight stem from the results of harm.**

## F PARTICIPANT DEMOGRAPHICS

Educational Background

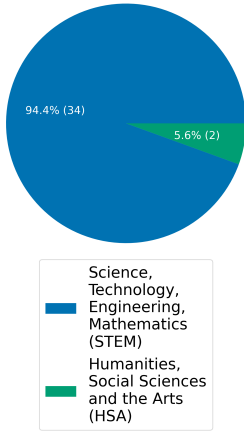

Highest Degree

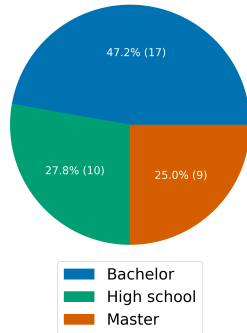

Familiarity with AI/ML

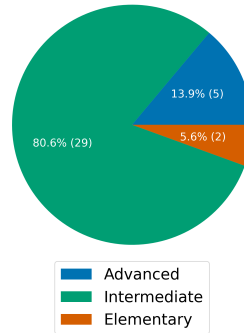

Age

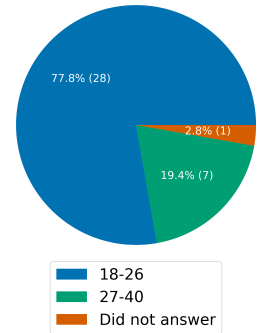

Political Views

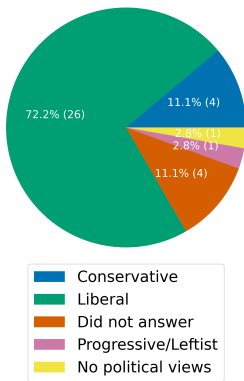

Race

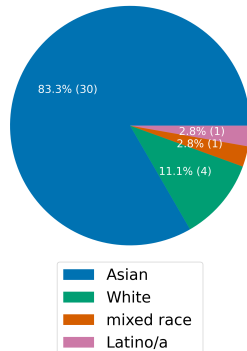

Gender

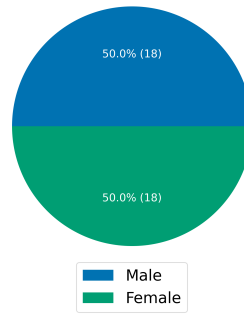

Marginalized Group Membership

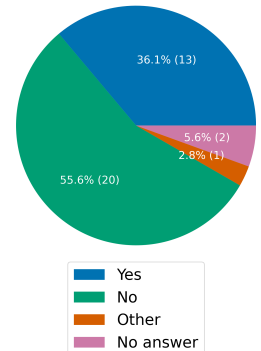

**Figure 7: Participants’ demographics and backgrounds. The sample appear relatively diverse (e.g. across gender, political leanings, and marginalized group membership) while it is highly homogeneous in other respects (e.g. most students have a STEM background, and belong to the same age and racial groups).**

## G STATISTICAL TESTS

Using the pre-activity and post-activity questionnaire responses pertaining to different RAI values as per [32], we generated a two-way contingency table as shown in Table 2. Note that this is a matrix form of the changes represented in Figure 1. Given this categorical data, we then performed two statistical tests of marginal homogeneity: a Bhapkar test [9] and a Stuart-Maxwell test [47, 69]. More specifically, we conducted these tests to investigate whether we could reject the null hypothesis: our classroom activity did not induce a change in value prioritization and we observed these differences by chance. Even though as per Keefe [35], the Bhapkar test is generally preferred as it is more powerful, we report results with both tests here.

Based on implementations in the DescTools package in R, the Bhapkar test yielded a p-value of 0.2217 and the Stuart-Maxwell test yielded a p-value of 0.34. At significance level  $\alpha = 0.05$ , neither of these results are statistically significant, which in turn means we fail to reject the null. However, we refer to existing literature such as Vuolo et al. [72] that highlights how tests like Stuart-Maxwell require hundreds of paired samples in order to test for conventional levels of significance. Given that our results with only 30 samples still yielded p-values somewhat close 0.05, we argue that this evidences the need for further research with more data for generalization and significance purposes.

|   | 0 | 1 | 2 | 3 | 4 | 5 |
|---|---|---|---|---|---|---|
| 0 | 2 | 1 | 0 | 0 | 0 | 0 |
| 1 | 2 | 4 | 0 | 0 | 3 | 0 |
| 2 | 0 | 0 | 0 | 0 | 0 | 0 |
| 3 | 0 | 1 | 0 | 2 | 0 | 0 |
| 4 | 0 | 0 | 0 | 0 | 8 | 1 |
| 5 | 2 | 0 | 1 | 0 | 1 | 2 |

**Table 2: Contingency table based on pre-activity and post-activity data from our classroom activity. Rows correspond to pre-activity responses and columns correspond to post-activity responses. Each row or column refers to a different RAI value as outlined in Jakesch et al. [32]. Category 0 refers to ‘Accountability & governance’, category 1 refers to ‘Fairness’, category 2 refers to ‘Performance & efficiency’, category 3 refers to ‘Privacy’, category 4 refers to ‘Safety’, and category 5 refers to ‘Transparency’. This information is also reflected in Figure 1.**

## H REPORTED AIID USABILITY RATINGS

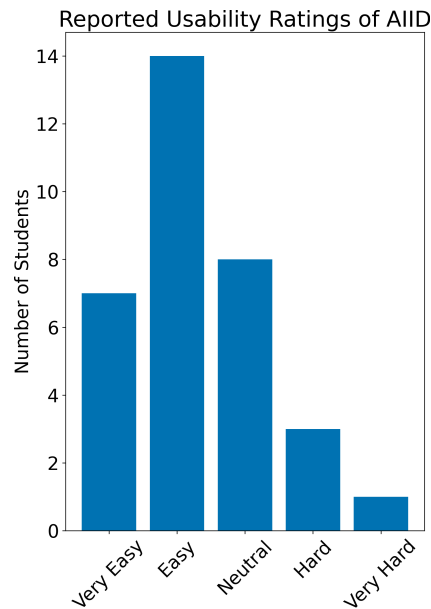

**Figure 8: Student feedback on the usability of the AI Incident Database. While the majority of students reported that the database was “Easy” or “Very Easy” to use, a nontrivial number of students were “Neutral” or stated that it was “Hard” or “Very Hard” to use. This suggests that while it is already useful, enhancements to the tool would increase its utility.**



## I AIID REVIEW QUEUE

|          |                                                                                                                                                                                                          |
|----------|----------------------------------------------------------------------------------------------------------------------------------------------------------------------------------------------------------|
| review > | <p>Getty Images is suing the creators of AI art tool Stable Diffusion for scraping its content</p> <p>Inc: 2023-01-17 Pub: 2023-01-17 Sub: 2023-01-17 Anonymous</p>                                      |
| review > | <p>ChatGPT banned from New York City's Public Schools' Devices and Networks</p> <p>Inc: 2023-01-05 Pub: 2023-01-05 Sub: 2023-01-17 Anonymous</p>                                                         |
| review > | <p>VALL-E's quickie voice deepfakes should worry you, if you weren't worried already</p> <p>Inc: 2023-01-05 Pub: 2023-01-12 Sub: 2023-01-17 Anonymous</p>                                                |
| review > | <p>ChatGPT Can Do a Lot, but It Can't Help You With White Hat Reports</p> <p>Inc: 2023-01-11 Pub: 2023-01-17 Sub: 2023-01-17 Anonymous</p>                                                               |
| review > | <p>Twitter keeps confusing rockets for 'intimate' content because of the platform's reliance on machine learning tools, report says</p> <p>Inc: 2023-01-03 Pub: 2023-01-05 Sub: 2023-01-17 Anonymous</p> |
| review > | <p>Self-driving Tesla causes eight-vehicle crash, injures child</p> <p>Inc: 2022-11-24 Pub: 2023-01-10 Sub: 2023-01-17 Anonymous</p>                                                                     |
| review > | <p>Emotion-reading tech fails the racial bias test</p> <p>Inc: 2018-12-06 Pub: 2019-01-03 Sub: 2023-01-17 Anonymous</p>                                                                                  |
| review > | <p>OpenAI punished dev who used GPT-3 to 'resurrect' the dead – was this fair?</p> <p>Inc: 2021-07-22 Pub: 2022-05-26 Sub: 2023-01-17 Anonymous</p>                                                      |

Figure 9: Snapshot of review queue containing reports submitted as part of our activity.
